# Supplementary material
Source: Springer Nature journal article supplement (https://www.springermedizin.de/resource/supplementary/12889_2011_3526_MOESM3_ESM.pdf/9489232)

**(a) SEIFA1**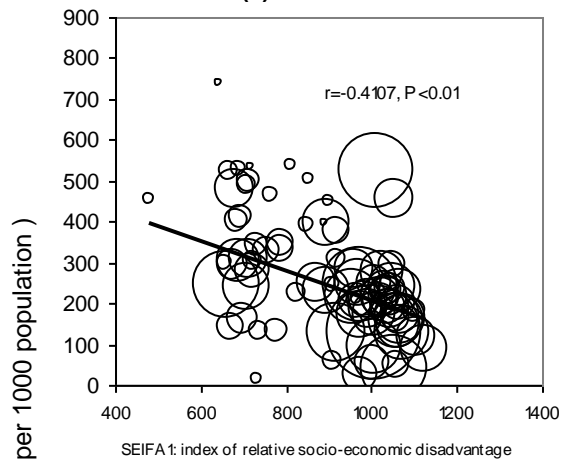**(b) SEIFA2**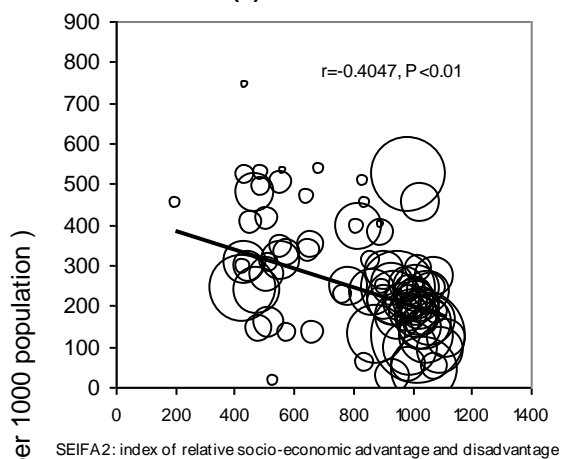

Population size

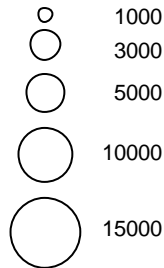**(c) SEIFA3**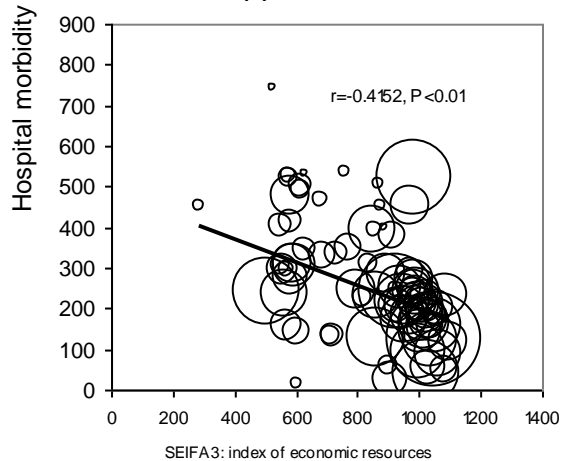**(d) SEIFA4**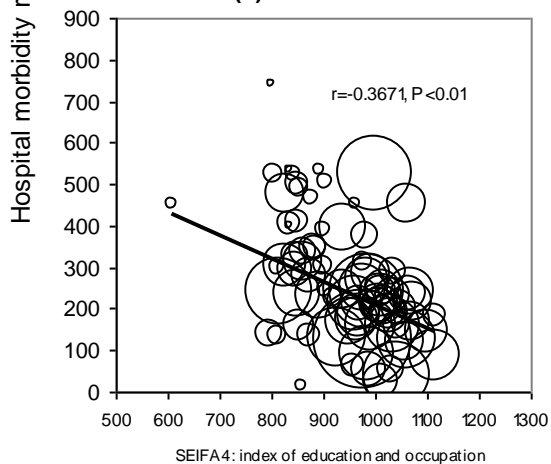

Supplement: MOESM3 [file 9489232]
